# Supplementary material for: Functional characterisation of osteosarcoma cell lines and identification of mRNAs and miRNAs associated with aggressive cancer phenotypes
Source: PubMed Central journal article supplement — Br J Cancer. 2013 Sep 24;109(8):2228–36. doi: 10.1038/bjc.2013.549 (PMC3798956; doi:10.1038/bjc.2013.549), 2013-09-24
Supplement: bjc2013549x7.pdf [file bjc2013549x7.pdf]

**Supplementary Table S5.** Functional enrichment analyses of the differently expressed mRNAs from the tumorigenic high/low comparison.

| Cluster number | Enrichment score | Term                                                   | Counts | Population hits | False discovery rate |
|----------------|------------------|--------------------------------------------------------|--------|-----------------|----------------------|
| 1              | 5.69             | Extracellular matrix                                   | 29     | 345             | 0,0000               |
|                |                  | Extracellular region part                              | 50     | 960             | 0,0000               |
|                |                  | Signal                                                 | 102    | 3250            | 0,0000               |
|                |                  | Proteinaceous extracellular matrix                     | 26     | 320             | 0,0000               |
|                |                  | Signal peptide                                         | 102    | 3250            | 0,0000               |
| 2              | 5.20             | Vasculature development                                | 22     | 251             | 0,0001               |
|                |                  | Blood vessel development                               | 21     | 245             | 0,0003               |
|                |                  | Blood vessel morphogenesis                             | 16     | 211             | 0,0609               |
|                |                  | Angiogenesis                                           | 10     | 148             | 6,3243               |
| 3              | 4.26             | Extracellular matrix organization                      | 13     | 104             | 0,0028               |
|                |                  | Extracellular structure organization                   | 14     | 163             | 0,0616               |
|                |                  | Collagen fibril organization                           | 5      | 29              | 4,8673               |
| 4              | 3.80             | Growth factor binding domain:IGFBP N-terminal          | 14     | 105             | 0,0005               |
|                |                  | SM00121:IB                                             | 6      | 20              | 0,0391               |
|                |                  | Insulin-like growth factor-binding protein, IGFBP      | 6      | 20              | 0,0373               |
|                |                  | Insulin-like growth factor-binding protein, N-terminal | 6      | 20              | 0,0491               |
|                |                  | Insulin-like growth factor binding protein, N-terminal | 5      | 12              | 0,0917               |
| 5              | 3.54             | Skeletal system development                            | 19     | 319             | 0,2113               |
|                |                  | Ossification                                           | 11     | 115             | 0,2413               |
|                |                  | Bone development                                       | 11     | 123             | 0,4196               |
|                |                  | Osteoblast differentiation                             | 6      | 42              | 2,8940               |

The terms in the five first clusters, with enrichment scores, are shown (only the first five terms in clusters 1 and 4).

The counts and population hits are the number of genes in the gene list and background gene list, respectively, mapping to a specific term.
