# Supplementary material for: Functional characterisation of osteosarcoma cell lines and identification of mRNAs and miRNAs associated with aggressive cancer phenotypes
Source: PubMed Central journal article supplement — Br J Cancer. 2013 Sep 24;109(8):2228–36. doi: 10.1038/bjc.2013.549 (PMC3798956; doi:10.1038/bjc.2013.549), 2013-09-24
Supplement: bjc2013549x8.pdf [file bjc2013549x8.pdf]

**Supplementary Table S6.** Functional enrichment analyses of the differently expressed mRNAs from the clonogenic high/low comparison.

| Cluster number | Enrichment score | Term                               | Counts | Population hits | False discovery rate |
|----------------|------------------|------------------------------------|--------|-----------------|----------------------|
| 1              | 4.04             | Extracellular matrix               | 8      | 241             | 0,0002               |
|                |                  | Extracellular region part          | 13     | 960             | 0,0005               |
|                |                  | Proteinaceous extracellular matrix | 8      | 320             | 0,0060               |
|                |                  | Extracellular matrix               | 8      | 345             | 0,0098               |
|                |                  | Secreted                           | 13     | 1689            | 0,0207               |
| 2              | 2.82             | Extracellular matrix               | 8      | 241             | 0,0002               |
|                |                  | Collagen                           | 5      | 35              | 0,0011               |
|                |                  | Proteinaceous extracellular matrix | 8      | 320             | 0,0060               |
|                |                  | Extracellular matrix part          | 6      | 117             | 0,0063               |
|                |                  | Extracellular matrix               | 8      | 345             | 0,0098               |
| 3              | 2.40             | Regulation of blood pressure       | 4      | 100             | 1,8312               |
|                |                  | Blood circulation                  | 4      | 186             | 10,1410              |
|                |                  | Circulatory system process         | 4      | 186             | 10,1410              |
| 4              | 2.16             | Focal adhesion                     | 6      | 201             | 0,1834               |
|                |                  | Small cell lung cancer             | 3      | 84              | 20,5064              |
|                |                  | Pathways in cancer                 | 4      | 328             | 47,6286              |
| 5              | 1.87             | Urogenital system development      | 4      | 110             | 2,4027               |
|                |                  | Gland development                  | 4      | 135             | 4,2684               |
|                |                  | Tissue morphogenesis               | 4      | 180             | 9,3046               |
|                |                  | Epithelium development             | 4      | 227             | 16,8330              |
|                |                  | Kidney development                 | 3      | 96              | 23,4571              |

The terms in the five first clusters, with enrichment scores, are shown (only the first five terms in clusters 1, 2 and 5).

The counts and population hits are the number of genes in the gene list and background gene list, respectively, mapping to a specific term.
