# Supplementary material for: Functional characterisation of osteosarcoma cell lines and identification of mRNAs and miRNAs associated with aggressive cancer phenotypes
Source: PubMed Central journal article supplement — Br J Cancer. 2013 Sep 24;109(8):2228–36. doi: 10.1038/bjc.2013.549 (PMC3798956; doi:10.1038/bjc.2013.549), 2013-09-24
Supplement: bjc2013549x10.pdf [file bjc2013549x10.pdf]

**Supplementary Table S8.** Functional enrichment analyses of the differently expressed mRNAs from the proliferation high/low comparison.

| Cluster number | Enrichment score | Term                               | Counts | Population hits | False discovery rate |
|----------------|------------------|------------------------------------|--------|-----------------|----------------------|
| 1              | 9.97             | Cell adhesion                      | 43     | 700             | 0,0000               |
|                |                  | Biological adhesion                | 43     | 701             | 0,0000               |
| 2              | 9.68             | Cell adhesion                      | 23     | 422             | 0,0010               |
|                |                  | Secreted                           | 76     | 1689            | 0,0000               |
|                |                  | Extracellular region part          | 55     | 960             | 0,0000               |
|                |                  | Signal                             | 102    | 3250            | 0,0000               |
|                |                  | Signal peptide                     | 102    | 3250            | 0,0000               |
| 3              | 5.42             | Extracellular region               | 81     | 2010            | 0,0000               |
|                |                  | Cell migration                     | 19     | 276             | 0,0026               |
|                |                  | Cell motion                        | 25     | 475             | 0,0047               |
|                |                  | Localization of cell               | 19     | 307             | 0,0119               |
| 4              | 5.33             | Cell motility                      | 19     | 307             | 0,0119               |
|                |                  | Extracellular matrix               | 25     | 241             | 0,0000               |
|                |                  | Proteinaceous extracellular matrix | 29     | 320             | 0,0000               |
|                |                  | Collagen                           | 12     | 35              | 0,0000               |
| 5              | 5.19             | Extracellular matrix               | 29     | 345             | 0,0000               |
|                |                  | Collagen                           | 15     | 95              | 0,0000               |
|                |                  | Skeletal system development        | 26     | 319             | 0,0000               |
|                |                  | Bone development                   | 14     | 123             | 0,0004               |
|                |                  | Ossification                       | 13     | 115             | 0,0012               |
|                |                  | Cartilage development              | 9      | 74              | 0,0703               |
|                |                  | Osteoblast differentiation         | 7      | 42              | 0,1363               |

The terms in the five first clusters, with enrichment scores, are shown (only the first five terms in clusters 2, 4 and 5).

The counts and population hits are the number of genes in the gene list and background gene list, respectively, mapping to a specific term.
